# Supplementary material for: Post-Acute Sequelae And Mitochondrial Aberration In SARS-CoV-2 Infection
Source: Preprints.org preprint supplement (doi:10.20944/preprints202406.1289.v1), 2024-06-18
Supplement: Supplementary file 3 [file supplementary]

Archive with 3 entries (3 files):
- Publication License May-08-2024.pdf
- Publication License May-09-2024.pdf
- Publication License May-19-2024.pdf
